# Supplementary material for: A new tetrakis β-diketone ligand for NIR emitting LnIII ions: luminescent doped PMMA films and flexible resins for advanced photonic applications
Source: Royal Society of Chemistry journal article supplement (doi:10.1039/c3tc31181c), 2013-01-01
Supplement: c3tc31181c.pdf [file c3tc31181c.pdf]

## Supporting Information For

### **A New Tetrakis $\beta$ -Diketone Ligand for NIR Emitting Ln<sup>III</sup> Ions: Luminescent Doped PMMA Films and Flexible Resins for Advanced Photonic Applications**

**Silvanose Biju,<sup>a\*</sup> Yu Kyung Eom,<sup>a</sup> Jean-Claude G. Bünzli<sup>a,b\*</sup> and Hwan Kyu Kim<sup>a\*</sup>**

<sup>a</sup> *Department of Advanced Materials Chemistry and WCU Center for Next Generation Photovoltaic Systems, Korea University, Jochiwon-eup, Sejong-si, 339-700, Republic of Korea.*

*E-mail: [hkk777@korea.ac.kr](mailto:hkk777@korea.ac.kr)*

*[drbijusilvanose@gmail.com](mailto:drbijusilvanose@gmail.com)*

*Fax: +82-44-860-1331; Tel: +82-44-860-1493*

<sup>b</sup> *Institute of Chemical Sciences and Engineering, École Polytechnique Fédérale de Lausanne, BCH 1402, CH-1015 Lausanne, Switzerland.*

*E-mail: [jean-claude.bunzli@epfl.ch](mailto:jean-claude.bunzli@epfl.ch)*

*Fax: +41 21 693 5550; Tel: +41 21 693 9821*

**6 Pages**

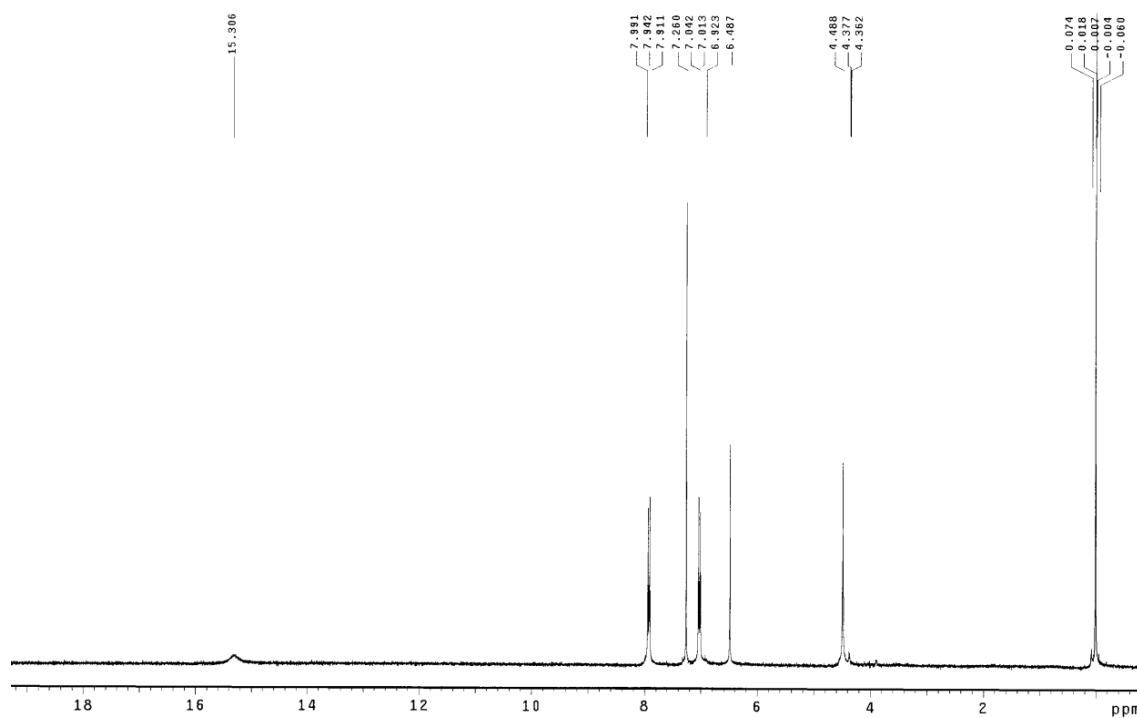

**Figure S1.**  $^1\text{H}$  NMR spectrum of  $\text{H}_4\text{L}$  in  $\text{CDCl}_3$ .

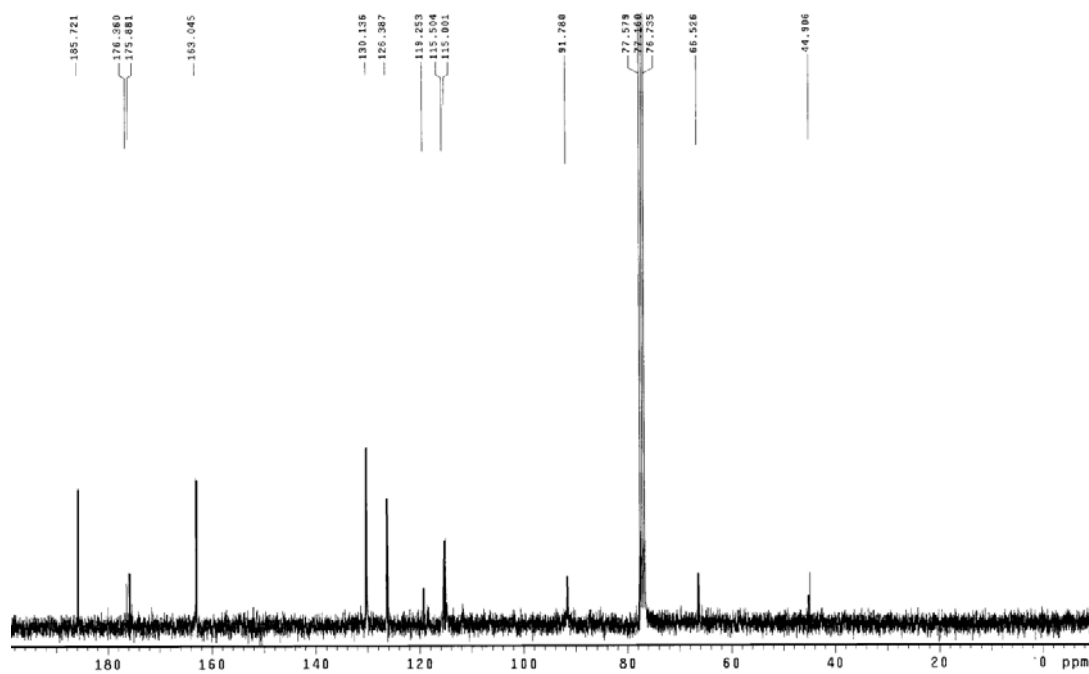

**Figure S2.**  $^{13}\text{C}$  NMR spectrum of  $\text{H}_4\text{L}$  in  $\text{CDCl}_3$ .

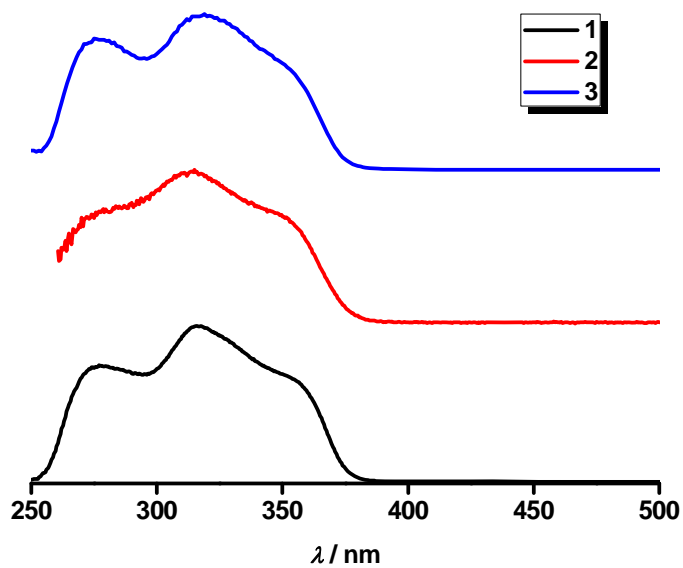

**Figure S3.** Excitation spectra of Ln<sup>III</sup> complexes in DMF ( $c = 10^{-5}$  M) at 298 K; emission monitored at 642 nm (1), 1540 nm (3) and 984 nm (4); vertical scale: arbitrary units.

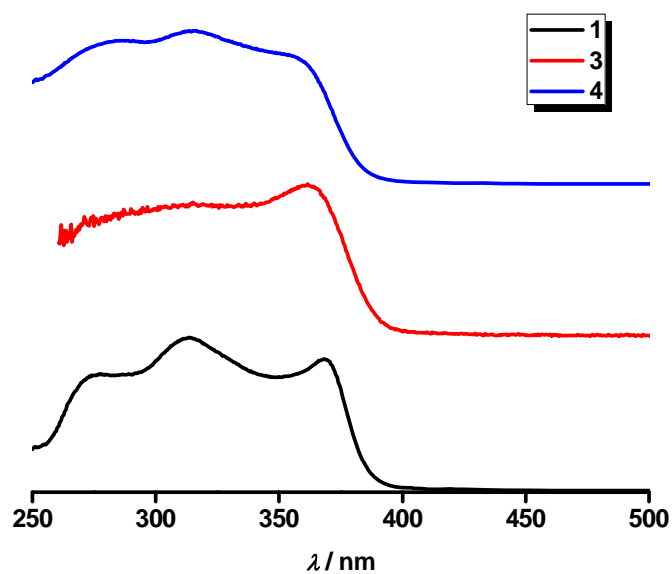

**Figure S4.** Excitation spectra of Ln<sup>III</sup> complexes doped PMMA films (4 wt%) at 298 K; emission monitored at 642 nm (1), 1540 nm (3) and 984 nm (4); vertical scale: arbitrary units.

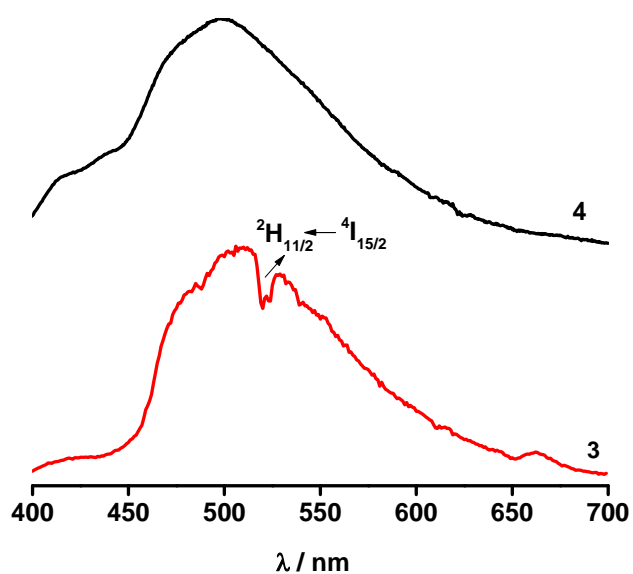

**Figure S5.** Corrected emission spectra of **3** and **4** at 298 K in solid state ( $\lambda_{\text{ex}} = 365 \text{ nm}$ ); vertical scale: arbitrary units.

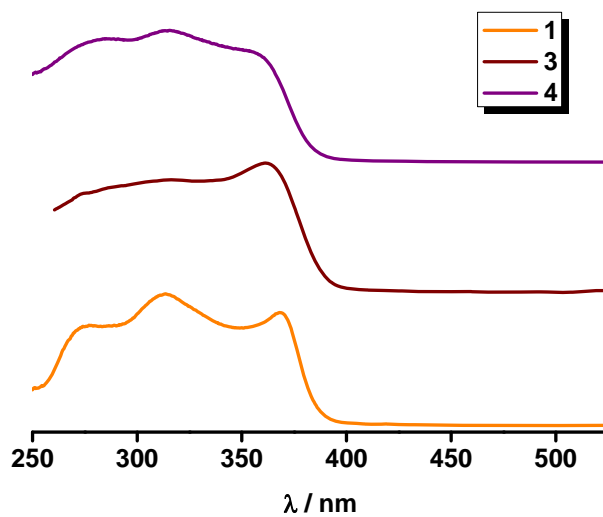

**Figure S6.** Excitation spectra of **1**, **3**, and **4** doped into PMMA fibres (4 wt%) at 298 K; vertical scale: arbitrary units.

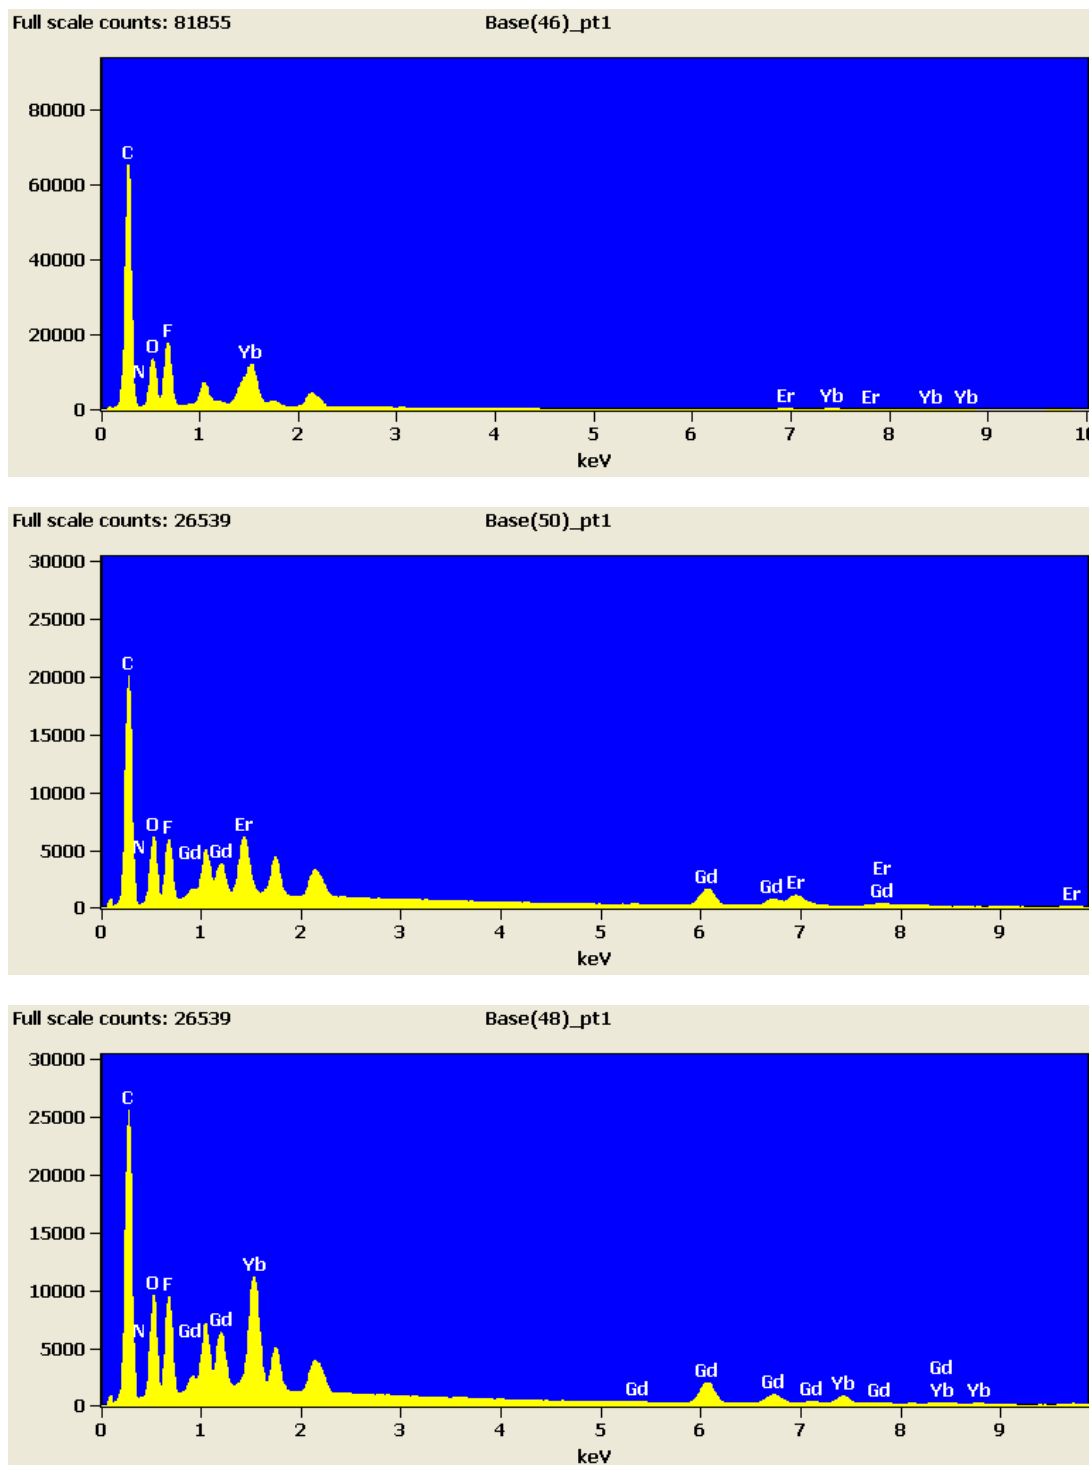

**Figure S7.** EDS spectra of heterometallic complexes 5-7.

**Table S1.** EDS elemental analysis data for heterometallic complexes **5-7**. L and M indicate the X-ray band used.

| $\text{Ln}_{0.5}\text{Ln}'_{0.5}$ | Element  | Wt (%) | At (%) | Ln/Ln' |
|-----------------------------------|----------|--------|--------|--------|
| $\text{Er}_{0.5}\text{Yb}_{0.5}$  | Er-M     | 25.23  | 3.54   | 1.03   |
|                                   | <b>5</b> | Yb-M   | 27.00  |        |
| $\text{Er}_{0.5}\text{Gd}_{0.5}$  | Er-L     | 20.59  | 3.76   | 0.97   |
|                                   | <b>6</b> | Gd-L   | 20.00  |        |
| $\text{Gd}_{0.5}\text{Yb}_{0.5}$  | Gd-L     | 17.39  | 3.26   | 1.00   |
|                                   | <b>7</b> | Yb-M   | 19.16  |        |

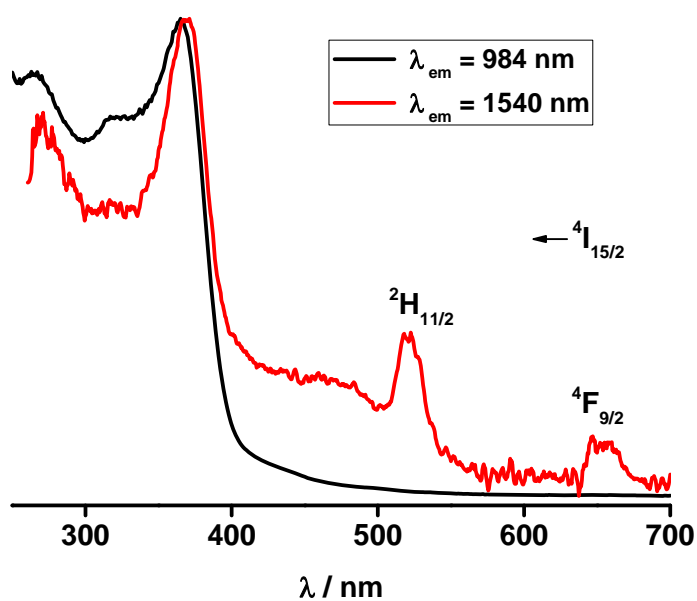

**Figure S8.** Excitation spectra of **5** at 298K in solid state; vertical scale: arbitrary units.
